# Supplementary material for: Streptococcus equi Infections in Horses: Guidelines for Treatment, Control, and Prevention of Strangles—Revised Consensus Statement
Source: PubMed Central journal article supplement — J Vet Intern Med. 2018 Feb 9;32(2):633–47. doi: 10.1111/jvim.15043 (PMC5867011; doi:10.1111/jvim.15043), 2018-02-09
Supplement: JVIM-32-633-s001.pdf [file JVIM-32-633-s001.pdf]

## ***S1. Population structure of *S equi****

Sequencing of the genomes of over 200 isolates of *S equi* recovered from outbreaks in the UK, Australia, Belgium, Canada, Ireland, New Zealand, Saudi Arabia, Sweden, and the USA has provided a global snapshot of the genetic diversity of *S equi* and the complex epidemiology of some individual outbreaks.<sup>21</sup> The sequence diversity observed in the global collection of isolates utilized by Harris et al. was surprisingly low, suggesting that the currently circulating worldwide strains of *S equi* share a common ancestor sometime between 1819 and 1946.<sup>21</sup> This period of history was marked by global conflicts during which horses performed critical roles.<sup>22</sup>

Persistence of *S equi* in the guttural pouch has been shown to drive both the diversification and decay of its genome, and potentially explains the path to host restriction.<sup>21</sup> During persistent infection the rate of mutation increases and genes that are not required for survival in the guttural pouch can be lost.<sup>21</sup> If the loss of genes affects the ability of *S equi* to cause strangles, such as those required for the production of the hyaluronic acid capsule or the equibactin siderophore, then those less virulent mutant strains have become an evolutionary dead-end.<sup>21</sup> However, if the lost genes – such as those required for lactose fermentation - are not required for the induction of strangles, then those losses are likely to become fixed in the population over time, reducing the ancestral capabilities of *S equi*, ultimately leading to its host restriction.<sup>23</sup>
